# Supplementary material for: Effect of variations in manufacturing and material properties on the self-folding behaviors of hydrogel and elastomer bilayer structures
Source: Royal Society of Chemistry journal article supplement (doi:10.1039/d2sm01104b), 2022-01-01
Supplement: d2sm01104b1.pdf [file d2sm01104b1.pdf]

## Electronic Supplementary Information

### **Effect of variations in manufacturing and material properties on the self-folding behaviors of hydrogel and elastomer bilayer structures**

*Jiayu Zhao<sup>1</sup>, Hesaneh Kazemi<sup>2</sup>, H. Alicia Kim<sup>2,4,5</sup>, Jinhye Bae<sup>1, 3, 4, 5\*</sup>*

<sup>1</sup>Department of NanoEngineering, University of California San Diego, 9500 Gilman Drive, La Jolla, CA 92093, USA.

<sup>2</sup>Structural Engineering Department University of California San Diego, 9500 Gilman Drive, La Jolla, CA 92093, USA.

<sup>3</sup>Chemical Engineering Program, University of California San Diego, 9500 Gilman Drive, La Jolla, CA 92093, USA.

<sup>4</sup>Material Science and Engineering Program, University of California San Diego, 9500 Gilman Drive, La Jolla, CA 92093, USA.

<sup>5</sup>Sustainable Power and Energy Center (SPEC), University of California San Diego, 9500 Gilman Drive, La Jolla, CA 92093, USA.

\*Corresponding author. Email: [j3bae@ucsd.edu](mailto:j3bae@ucsd.edu) (Jinhye Bae)

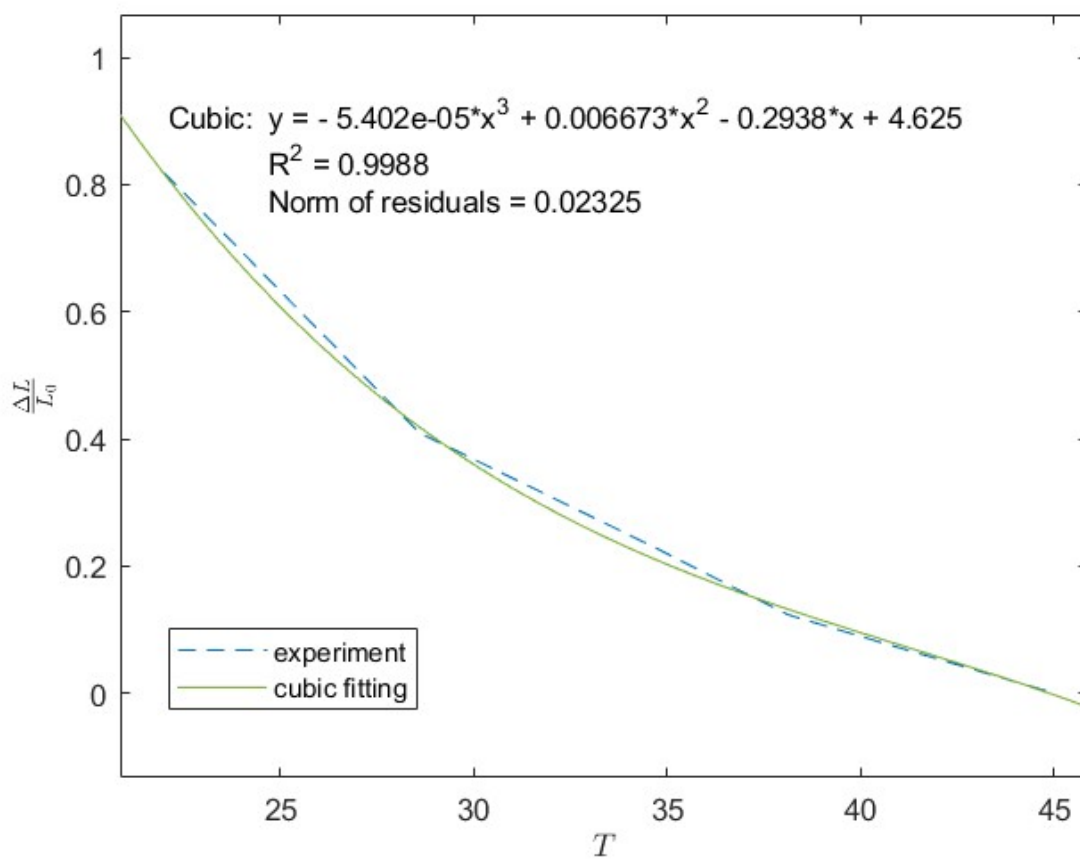

**Fig. S1.** A cubic curve fitting over the length ratio  $\frac{\Delta L}{L_0}$  of NC-PNIPAM as a function of temperature T.

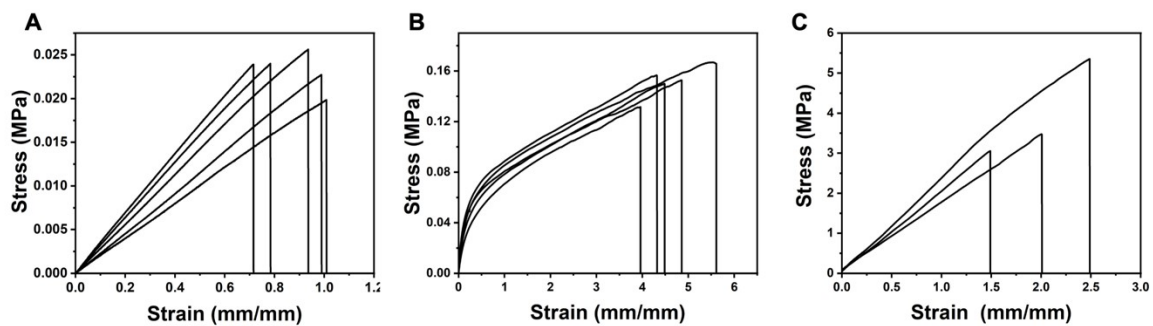

**Fig. S2.** Stress-strain curves of the NC-PNIPAM at (A) swelled state and (B) de-swelled state, and (C) PDMS substrate.

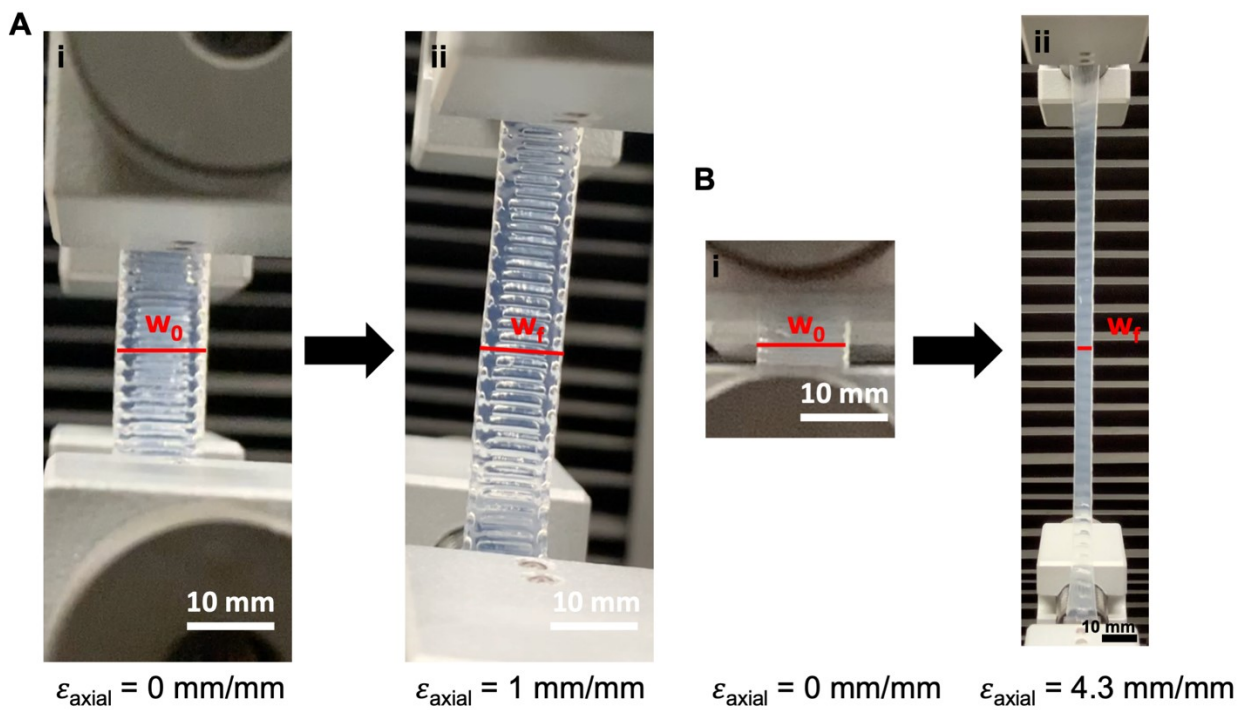

**Fig. S3.** Photographs of **(A)** swelled and **(B)** de-swelled NC-PNIPAM (i) before and (ii) after stretching, in which  $w_0$  and  $w_f$  refers to the initial and final width of the tested sample, respectively.

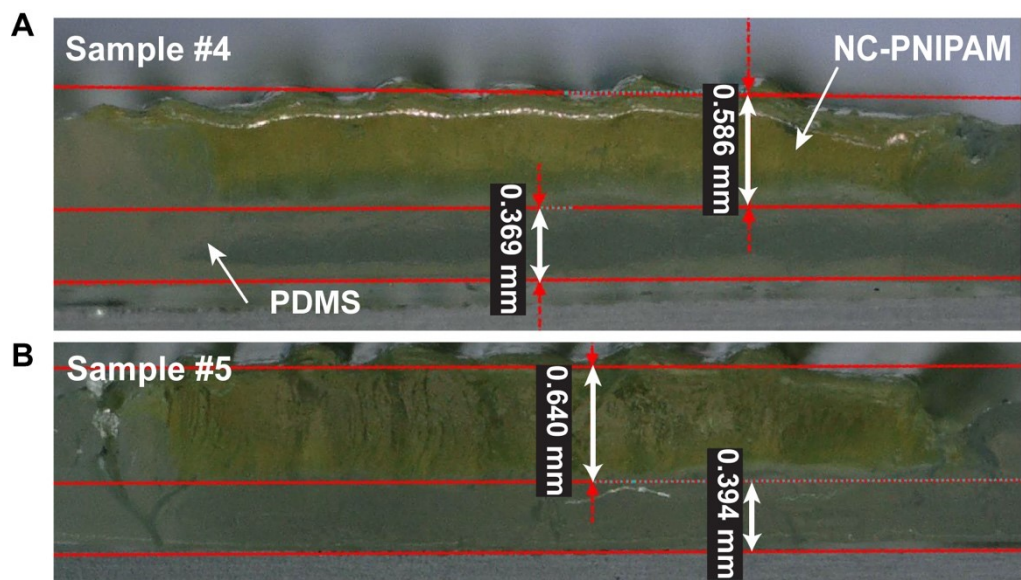

**Fig. S4.** Optical microscope photographs of the cross-sectional view of the hinge-based bilayer structure of NC-PNIPAM/PDMS printed with the target thickness ( $h_1 = 0.6$  mm,  $h_2 = 0.4$  mm). **(A)** Sample #4 with  $h_1 = 0.586$  mm,  $h_2 = 0.369$  mm; **(B)** sample #5 with  $h_1 = 0.640$  mm,  $h_2 = 0.394$  mm.

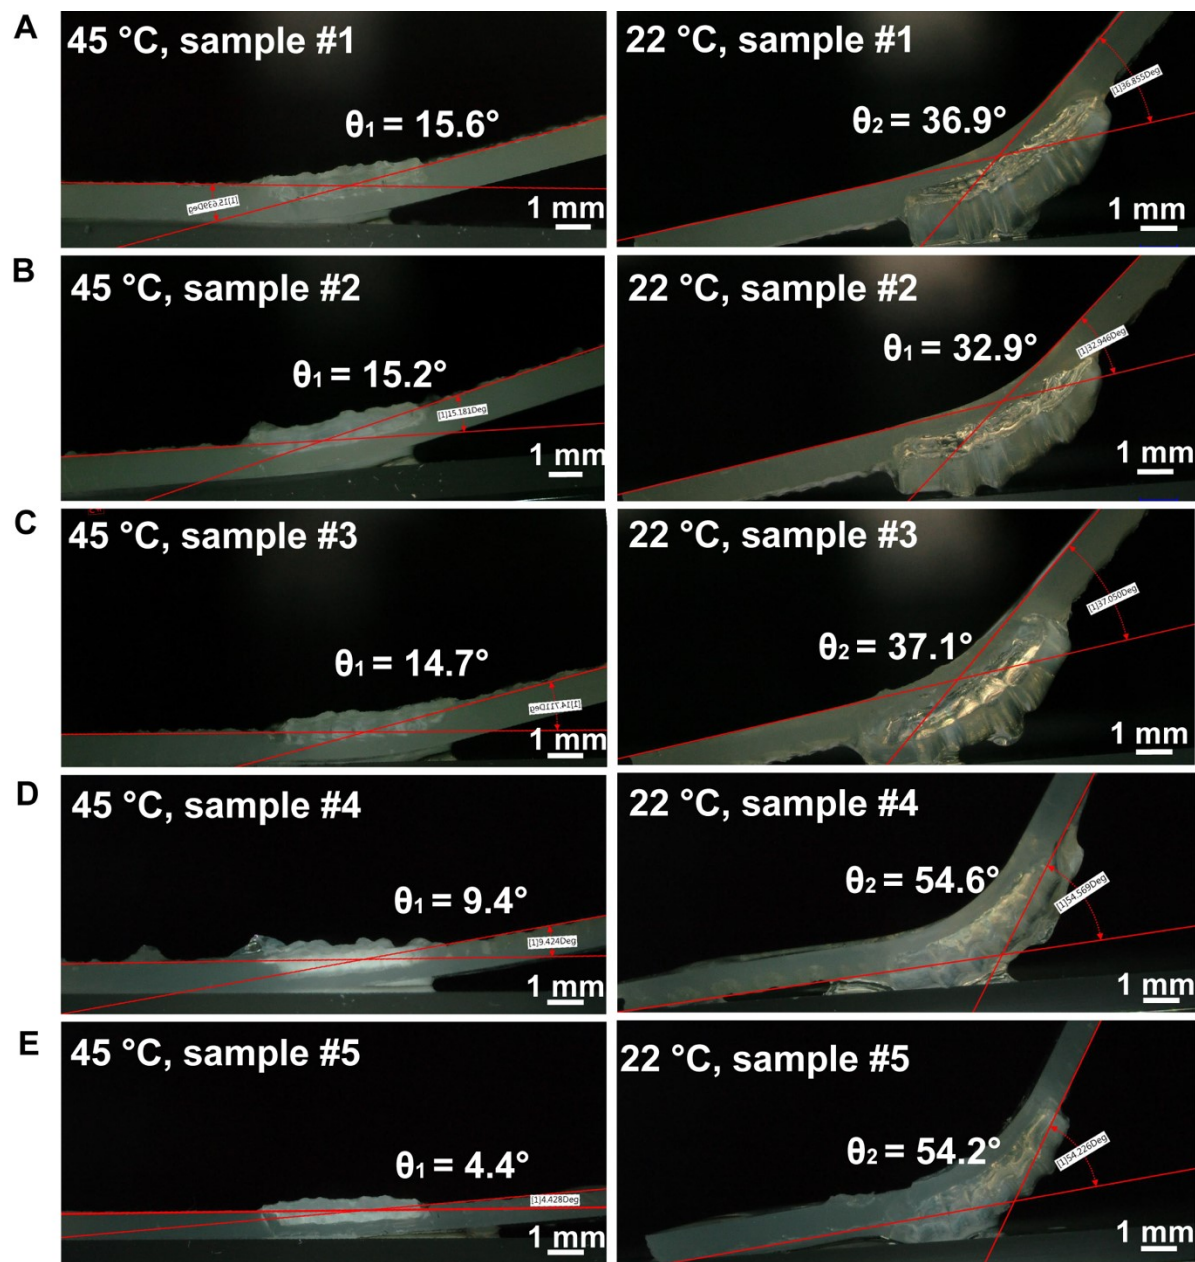

**Fig. S5.** Optical microscope photographs of the hinge-based bilayer structure of NC-PNIPAM/PDMS sample #1 - #5 de-swelled at 45 °C and swelled at 22 °C (A)-(E), respectively.
